# Supplementary material
Source: Springer Nature journal article supplement (https://www.springermedizin.de/resource/supplementary/12874_2010_495_MOESM4_ESM.pdf/9432218)

Superiority

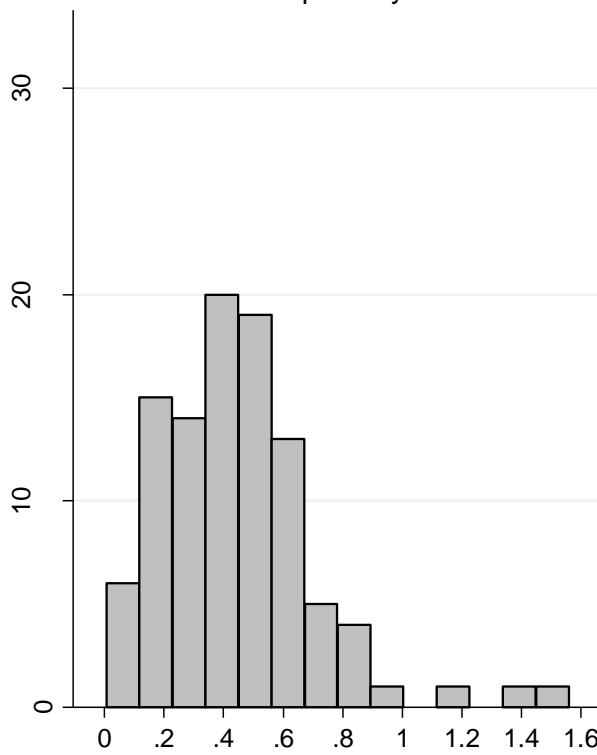

Noninferiority

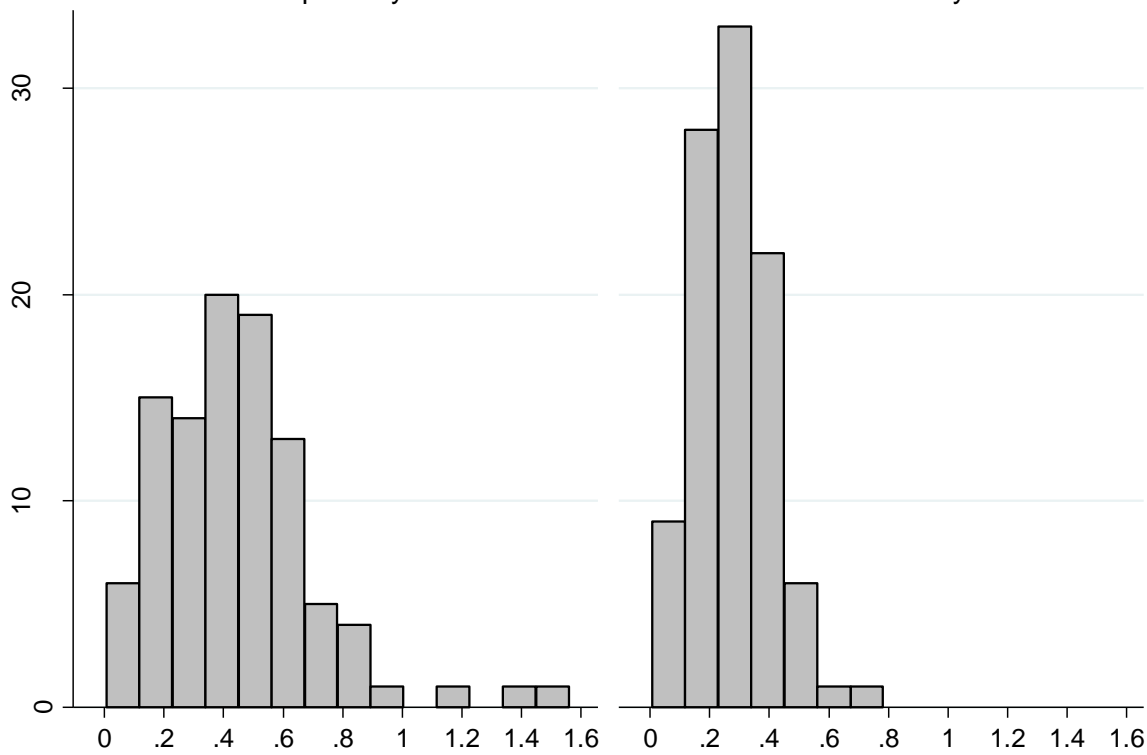

Standardized differences reported

Supplement: MOESM4 [file 9432218]
